# Supplementary material for: A possible atmospheric source of HNO3: the ammonolysis reaction of t-N2O4 in the presence of water monomer, water dimer, and sulfuric acid
Source: Royal Society of Chemistry journal article supplement (doi:10.1039/d3ea00095h), 2023-01-01
Supplement: d3ea00095h1.pdf [file d3ea00095h1.pdf]

## Supporting information

-for-

### A Possible Atmospheric Source of HNO<sub>3</sub>: The ammonolysis reaction of *t*-N<sub>2</sub>O<sub>4</sub> in the Presence of Water Monomer, Water Dimer and Sulfuric Acid

Ruxue Mu<sup>a,‡</sup>, Weixin Zhou<sup>a,‡</sup>, Zhaozhao Hong<sup>a</sup>, Rui Wang<sup>a</sup>, Quan Liu<sup>a</sup>,

Qiang Zhang<sup>a</sup>, Min Jiang<sup>a</sup>, Balaganesh Muthiah<sup>b</sup>, Tianlei Zhang<sup>a,\*</sup>

<sup>a</sup> Institute of Theoretical and Computational Chemistry, Shaanxi Key Laboratory of Catalysis, School of Chemical & Environment Science, Shaanxi University of Technology, Hanzhong, Shaanxi 723000, P. R. China

<sup>b</sup> Department of Chemistry, National Taiwan University, Taipei 106, Taiwan

| S. NO | Caption                                                                                                                                                                                                                                                                                                                                                                                                                                                                                                                                                                                                                                                                                                |
|-------|--------------------------------------------------------------------------------------------------------------------------------------------------------------------------------------------------------------------------------------------------------------------------------------------------------------------------------------------------------------------------------------------------------------------------------------------------------------------------------------------------------------------------------------------------------------------------------------------------------------------------------------------------------------------------------------------------------|
| S3    | <b>Figure S1</b> The optimized geometries for the species involved in the <i>t</i> -N <sub>2</sub> O <sub>4</sub> + NH <sub>3</sub> reaction at different levels of theory                                                                                                                                                                                                                                                                                                                                                                                                                                                                                                                             |
| S4    | <b>Table S1</b> The energy barriers ( $\Delta E$ ) and unsigned error (UE) (kcal·mol <sup>-1</sup> ) for the <i>t</i> -N <sub>2</sub> O <sub>4</sub> + NH <sub>3</sub> → HNO <sub>3</sub> + NH <sub>2</sub> NO reaction at different theoretical methods with zero-point energy (ZPE) correction                                                                                                                                                                                                                                                                                                                                                                                                       |
| S5    | <b>Table S2</b> Energies for the ammonolysis of <i>t</i> -N <sub>2</sub> O <sub>4</sub> with zero-point correction (ZPE/(kcal·mol <sup>-1</sup> )) included at the levels of CCSD(T)/aug-cc-pVTZ//B3LYP-D3/6-311++G(3df,2pd) and UCCSD(T)/6-311+G(3df,2p)//UB3LYP/6-311+G(3df,2p)                                                                                                                                                                                                                                                                                                                                                                                                                      |
| S6    | <b>Figure S2</b> Optimized geometries and binding energies of the reactant and complexes <i>t</i> -N <sub>2</sub> O <sub>4</sub> ··· <i>X</i> and NH <sub>3</sub> ··· <i>X</i> ( <i>X</i> = H <sub>2</sub> O, (H <sub>2</sub> O) <sub>2</sub> , and H <sub>2</sub> SO <sub>4</sub> ) at the CCSD(T)/aug-cc-pVTZ//B3LYP-D3/6-311++G(3df,2pd) level (bond distance in Angstroms and angles in degrees)                                                                                                                                                                                                                                                                                                   |
| S7    | <b>Figure S3</b> The optimized geometries and the electric energies (in Hartree-Fock) of <i>t</i> -N <sub>2</sub> O <sub>4</sub> ···NH <sub>3</sub> ··· <i>X</i> ( <i>X</i> = H <sub>2</sub> O, (H <sub>2</sub> O) <sub>2</sub> , and H <sub>2</sub> SO <sub>4</sub> ) at the B3LYP-D3/6-311++G(3df,2pd) level (bond distances in Angstroms and angles in degrees)                                                                                                                                                                                                                                                                                                                                     |
| S8    | <b>Table S3</b> Zero-point energies (ZPE/(kcal·mol <sup>-1</sup> )), relative energies ( $\Delta E$ and $\Delta(E + ZPE)$ /(kcal·mol <sup>-1</sup> )), enthalpies ( $\Delta H(298\text{ K})$ /(kcal·mol <sup>-1</sup> )), entropy ( $S(298\text{ K})$ /(cal·mol <sup>-1</sup> ·K <sup>-1</sup> )), <i>T</i> <sub>1</sub> diagnostic values and free energies ( $\Delta G(298\text{ K})$ /(kcal·mol <sup>-1</sup> )) for the reactants, intermediates and transition states involved in the <i>t</i> -N <sub>2</sub> O <sub>4</sub> + NH <sub>3</sub> reaction without and with catalyst <i>X</i> ( <i>X</i> = H <sub>2</sub> O, (H <sub>2</sub> O) <sub>2</sub> , and H <sub>2</sub> SO <sub>4</sub> ) |
| S9    | <b>Figure S4</b> Hindrance potentials for <i>t</i> -N <sub>2</sub> O <sub>4</sub> , <i>t</i> -N <sub>2</sub> O <sub>4</sub> ···NH <sub>3</sub> , and HNO <sub>3</sub> calculated at the B3LYP-D3/6-311++G(3df,2pd) level                                                                                                                                                                                                                                                                                                                                                                                                                                                                               |
| S10   | <b>Table S4</b> Equilibrium constants (cm <sup>3</sup> ·molecule <sup>-1</sup> ) for NH <sub>3</sub> ···H <sub>2</sub> O, NH <sub>3</sub> ···(H <sub>2</sub> O) <sub>2</sub> , and NH <sub>3</sub> ···H <sub>2</sub> SO <sub>4</sub> within the range of 213-320 K and 0-15 km                                                                                                                                                                                                                                                                                                                                                                                                                         |
| S11   | <b>Table S5</b> Concentrations (molecule·cm <sup>-3</sup> ) of H <sub>2</sub> O, (H <sub>2</sub> O) <sub>2</sub> , and H <sub>2</sub> SO <sub>4</sub> within the temperature range of 280-320 K                                                                                                                                                                                                                                                                                                                                                                                                                                                                                                        |

\* Corresponding authors. Tel: +86-0916-2641083, Fax: +86-0916-2641083.

E-mail: ztianlei88@163.com (T. L. Zhang).

‡ Ruxue Mu and Weixin Zhou have contributed equally to this work.

|     |                                                                                                                                                                                                                                                                                                                                                                                                 |
|-----|-------------------------------------------------------------------------------------------------------------------------------------------------------------------------------------------------------------------------------------------------------------------------------------------------------------------------------------------------------------------------------------------------|
| S12 | <b>Table S6</b> Concentrations ( $\text{molecule}\cdot\text{cm}^{-3}$ ) of $\text{H}_2\text{O}$ , $(\text{H}_2\text{O})_2$ , and $\text{H}_2\text{SO}_4$ at different altitudes in troposphere                                                                                                                                                                                                  |
| S13 | <b>Table S7</b> The high-pressure limiting rate constants ( $\text{cm}^3\cdot\text{molecule}^{-1}\cdot\text{s}^{-1}$ ) for the route from reactants to pre-reactive calculated by master equation within the altitude range of 0-15 km                                                                                                                                                          |
| S14 | <b>Table S8</b> Rate constants ( $k$ ) (in $\text{cm}^3\cdot\text{molecule}^{-1}\cdot\text{s}^{-1}$ ) for the $t\text{-N}_2\text{O}_4 + \text{NH}_3$ reaction without and with catalyst $X$ ( $X = \text{H}_2\text{O}$ , $(\text{H}_2\text{O})_2$ , and $\text{H}_2\text{SO}_4$ ) calculated by master equation within the temperature range of 280-320 K and the pressure range of 10-760 Torr |
| S15 | <b>Table S9</b> Calculated effective rate constants ( $k'$ , $\text{s}^{-1}$ ) for the $t\text{-N}_2\text{O}_4 + \text{NH}_3$ reaction with catalyst $X$ ( $X = \text{H}_2\text{O}$ , $(\text{H}_2\text{O})_2$ , and $\text{H}_2\text{SO}_4$ ) within the temperature range of 280-320 K                                                                                                        |

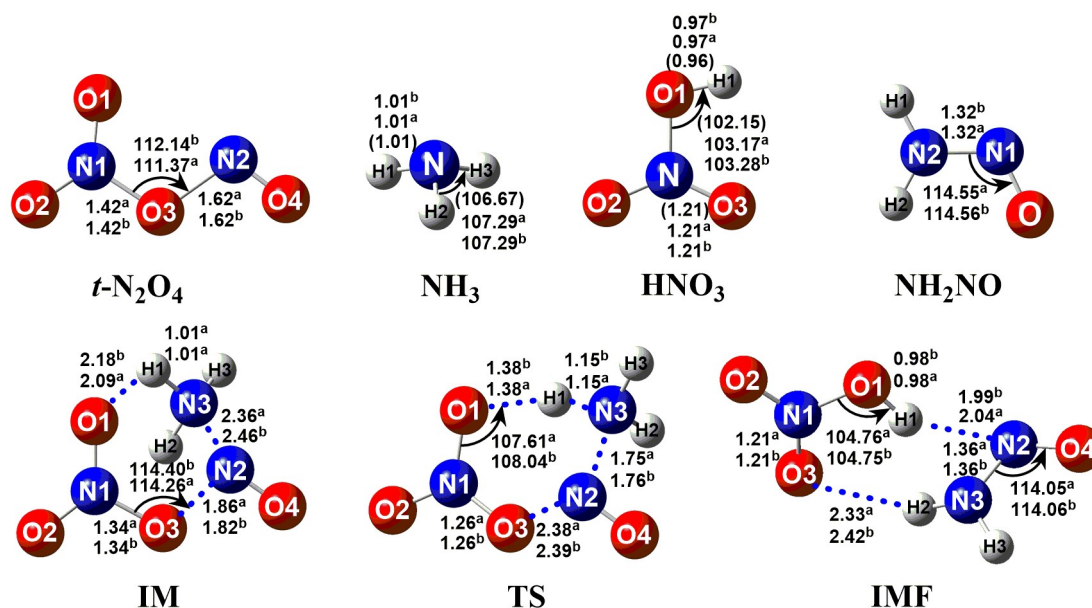

**Figure S1** The optimized geometries for the species involved in the  $t\text{-N}_2\text{O}_4 + \text{NH}_3$  reaction at different levels of theory

<sup>a</sup> and <sup>b</sup> respectively represent the values obtained at the B3LYP-D3/6-311++G(3df,2pd) and UB3LYP/6-311+G(3df,2p) levels of theory. (The values in parentheses were the experimental values; bond length is in angstrom and angle is in degree.)

For the geometric parameters of the reactants, pre-reactive complexes, transition states and products, the calculated bond distances and bond angles at the B3LYP-D3/6-311++G(3df,2pd) level agree well with the available experimental values where the mean absolute deviation of calculated bond distances and bond angles between the B3LYP-D3/6-311++G(3df,2pd) level and the experimental reports (G. Herzberg, *Electronic spectra and electronic structure of polyatomic molecules*[J]. *Van Nostrand, New York*, 1966.; A. P. Cox, J. M. Riveros, *Microwave spectrum and structure of nitric acid*[J]. *J. Chem. Phys.*, 1965, **42**, 3106-3112.) were 0.10 Å and 0.77°, respectively. So, the B3LYP-D3/6-311++G(3df,2pd) was reliable to optimize the geometries of all the stationary points in the  $t\text{-N}_2\text{O}_4 + \text{NH}_3$  reaction.

**Table S1** The energy barriers ( $\Delta E$ ) and unsigned error (UE) ( $\text{kcal}\cdot\text{mol}^{-1}$ ) for the  $t\text{-N}_2\text{O}_4 + \text{NH}_3 \rightarrow \text{HNO}_3 + \text{NH}_2\text{NO}$  reaction at different theoretical methods with zero-point energy (ZPE) correction

| Methods                                         | $\Delta E^a$ | $\Delta E^b$ | $\Delta E^c$ | UE   |
|-------------------------------------------------|--------------|--------------|--------------|------|
| CCSD(T)/CBS//B3LYP-D3/6-311++G(3df,2pd)         | -0.1         | 3.4          | -14.4        | 0.00 |
| CCSD(T)/aug-cc-pVTZ//B3LYP-D3/6-311++G(3df,2pd) | -0.5         | 3.2          | -14.3        | 0.23 |
| CCSD(T)-F12/cc-pVDZ//B3LYP-D3/6-311++G(3df,2pd) | 0.3          | 4.1          | -14.2        | 0.43 |

<sup>a</sup>, <sup>b</sup> and <sup>c</sup> respectively denote the species of pre-reactive complexes, transition states and post-reactive complexes involved in  $t\text{-N}_2\text{O}_4 + \text{NH}_3$  reaction.

To check the accuracy of the single-point energies calculation at the CCSD(T)/aug-cc-pVTZ level, the single-point energies based on the optimized geometries at B3LYP-D3/6-311++G(3df,2pd) are also calculated at the CCSD(T)/CBS//B3LYP-D3/6-311++G(3df,2pd) and CCSD(T)-F12/cc-pVDZ//B3LYP-D3/6-311++G(3df,2pd) levels. As seen in Table S1, the energies difference among three levels of CCSD(T)/CBS//B3LYP-D3/6-311++G(3df,2pd), CCSD(T)/aug-cc-pVTZ//B3LYP-D3/6-311++G(3df,2pd) and CCSD(T)-F12/cc-pVDZ//B3LYP-D3/6-311++G(3df,2pd) are less than 0.4  $\text{kcal}\cdot\text{mol}^{-1}$ . Thus, the CCSD(T)/aug-cc-pVTZ//B3LYP-D3/6-311++G(3df,2pd) was reliable to calculate the single point energies of all the species in the  $t\text{-N}_2\text{O}_4 + \text{NH}_3$  reaction without and with  $\text{H}_2\text{O}$ ,  $(\text{H}_2\text{O})_2$ , and  $\text{H}_2\text{SO}_4$ .

**Table S2** Energies for the ammonolysis of  $t\text{-N}_2\text{O}_4$  with zero-point correction (ZPE/(kcal·mol<sup>-1</sup>)) included at the levels of CCSD(T)/aug-cc-pVTZ//B3LYP-D3/6-311++G(3df,2pd) and UCCSD(T)/6-311+G(3df,2p)//UB3LYP/6-311+G(3df,2p)

| Species                                            | This work <sup>a</sup> | Lin <sup>b</sup> |
|----------------------------------------------------|------------------------|------------------|
| $t\text{-N}_2\text{O}_4 + \text{NH}_3$             | 0.0                    | 0.0              |
| IM ( $t\text{-N}_2\text{O}_4 \cdots \text{NH}_3$ ) | -0.5                   | -1.6             |
| TS                                                 | 3.2                    | 3.7              |
| IMF ( $\text{HNO}_3 \cdots \text{NH}_2\text{NO}$ ) | -14.3                  | -14.6            |
| $\text{HNO}_3 + \text{NH}_2\text{NO}$              | -9.5                   | -10.1            |

<sup>a</sup> Calculated at the CCSD(T)/aug-cc-pVTZ//B3LYP-D3/6-311++G(3df,2pd) level;

<sup>b</sup> The values are reported from reference (H. P. Trac, T. Le Huyen and M.-C. Lin, A Computational Study on the Redox Reactions of Ammonia and Methylamine with Nitrogen Tetroxide, *J. Phys. Chem. A*, 2020, **124**, 9923-9932.) and calculated at the UCCSD(T)/6-311+G(3df,2p)//UB3LYP/6-311+G(3df,2p) level.

The relative energies reported by Lin *et al.* (H. P. Trac, T. Le Huyen and M.-C. Lin, A Computational Study on the Redox Reactions of Ammonia and Methylamine with Nitrogen Tetroxide, *J. Phys. Chem. A*, 2020, **124**, 9923-9932.) at the UCCSD(T)/6-311+G(3df,2p)//UB3LYP/6-311+G(3df,2p) level is defined as the energy of pre-reactive complex, transition state complex, and post-reactive complex relative to the total energies of  $\text{N}_2\text{O}_4$  and  $\text{NH}_3$  reactants. Whereas, the relative energies in Fig. 1 is defined as the energy of pre-reactive complex, transition state complex, and post-reactive complex relative to the total energies of  $t\text{-N}_2\text{O}_4$  and  $\text{NH}_3$  reactants. In order to compare with the relative energies in Fig. 1,  $\text{N}_2\text{O}_4$  and  $t\text{-N}_2\text{O}_4$  are optimized at the UB3LYP/6-311+G(3df,2p) level. Then, their single-point energy calculation was performed at the UCCSD(T)/6-311+G(3df,2p). In order to avoid confusing data,  $t\text{-N}_2\text{O}_4 + \text{NH}_3$  was chosen as the reactants both in Fig. 1 of this work and Table S2 of the work reported by Lin *et al.* (H. P. Trac, T. Le Huyen and M.-C. Lin, A Computational Study on the Redox Reactions of Ammonia and Methylamine with Nitrogen Tetroxide, *J. Phys. Chem. A*, 2020, **124**, 9923-9932.). Now, the relative energy of IM to the  $t\text{-N}_2\text{O}_4 + \text{NH}_3$  reactants is -0.5 kcal·mol<sup>-1</sup> at the CCSD(T)/aug-cc-pVTZ//B3LYP-D3/6-311++G(3df,2pd) level, which is close to the value of -1.6 kcal·mol<sup>-1</sup> reported by Lin *et al.* at the UCCSD(T)/6-311+G(3df,2p)//UB3LYP/6-311+G(3df,2p) level.

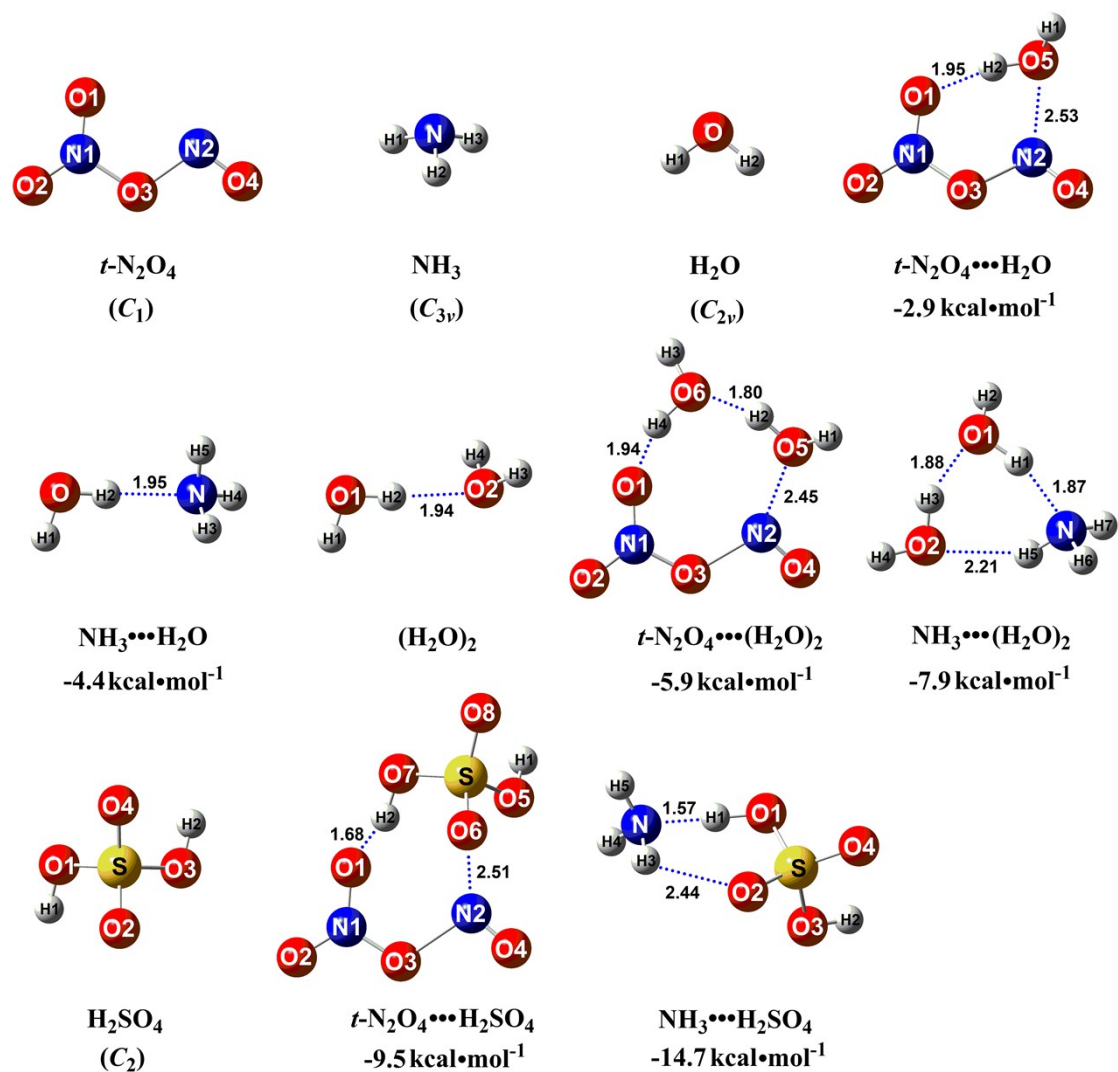

**Figure S2** Optimized geometries and binding energies of the reactant and complexes  $t\text{-N}_2\text{O}_4 \cdots X$  and  $\text{NH}_3 \cdots X$  ( $X = \text{H}_2\text{O}$ ,  $(\text{H}_2\text{O})_2$ , and  $\text{H}_2\text{SO}_4$ ) at the CCSD(T)/aug-cc-pVTZ//B3LYP-D3/6-311++G(3df,2pd) level (bond distance in Angstroms and angles in degrees)

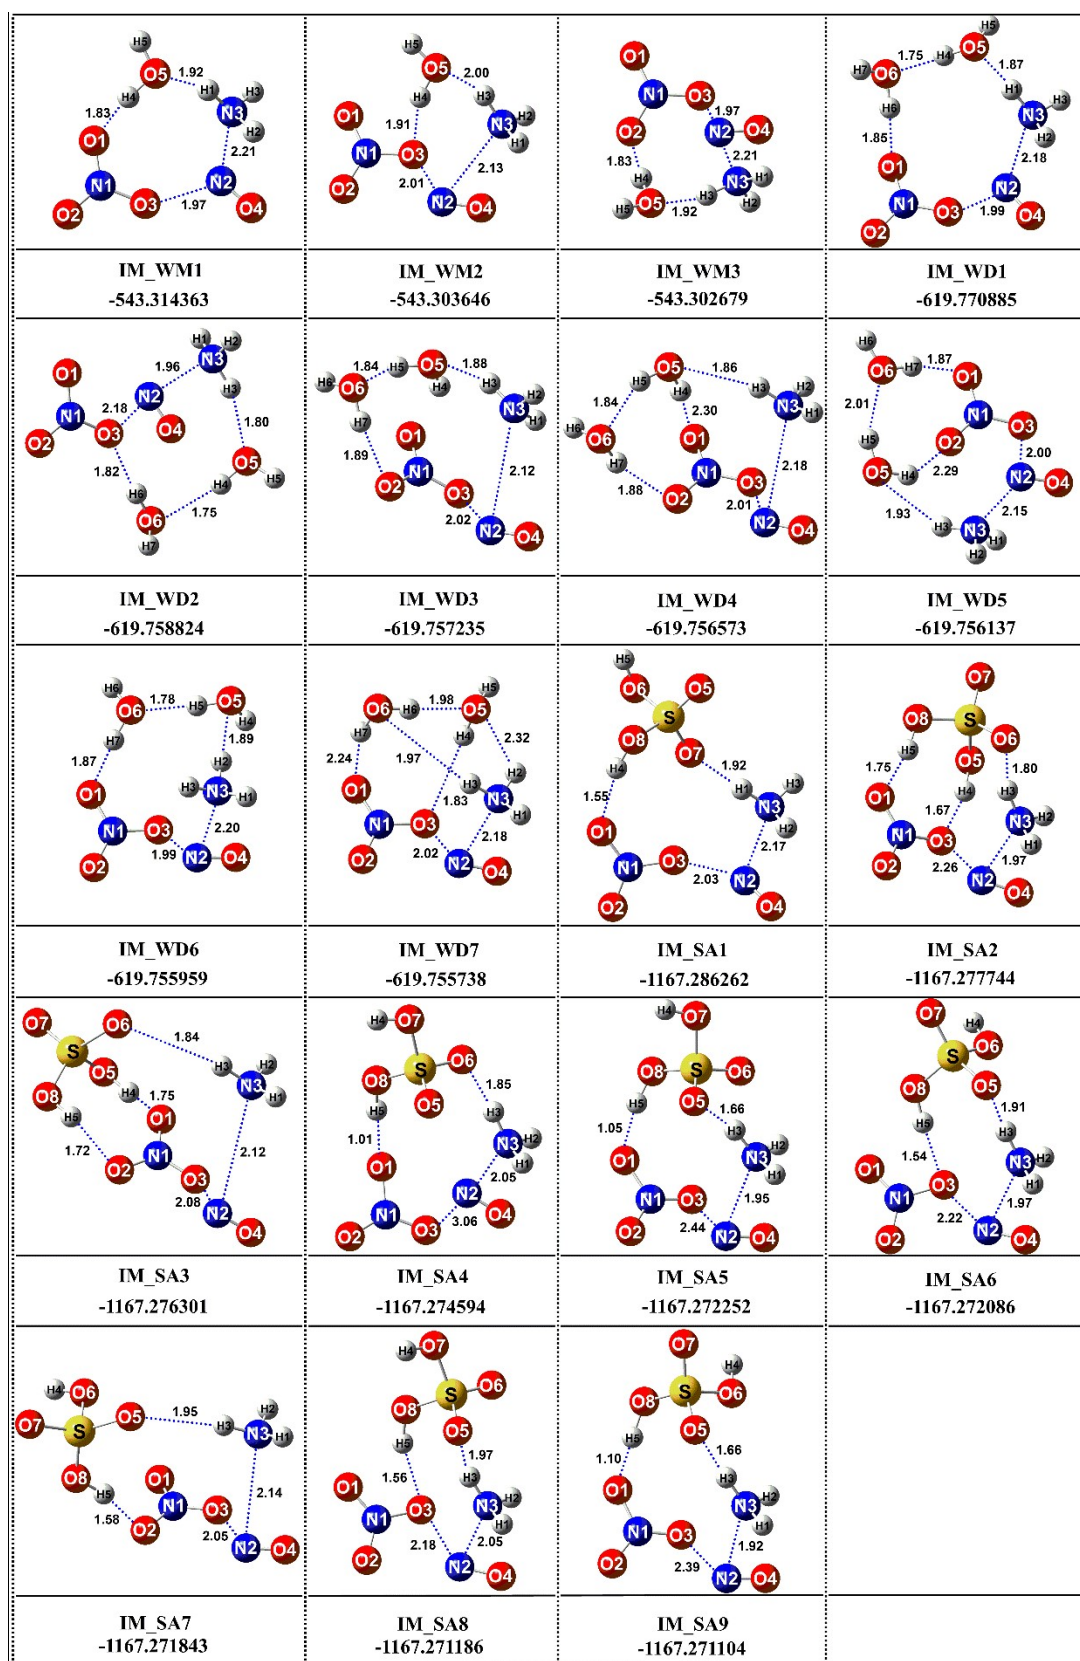

**Figure S3** The optimized geometries and the electric energies (in Hartree-Fock) of  $t$ -N<sub>2</sub>O<sub>4</sub>⋯NH<sub>3</sub>⋯X (X = H<sub>2</sub>O, (H<sub>2</sub>O)<sub>2</sub>, and H<sub>2</sub>SO<sub>4</sub>) at the B3LYP-D3/6-311++G(3df,2pd) level (bond distances in Angstroms and angles in degrees)

**Table S3** Zero-point energies (ZPE/(kcal·mol<sup>-1</sup>)), relative energies ( $\Delta E$  and  $\Delta(E + ZPE)$ /(kcal·mol<sup>-1</sup>)), enthalpies ( $\Delta H(298\text{ K})$ /(kcal·mol<sup>-1</sup>)), entropy (S(298 K)/(cal·mol<sup>-1</sup>·K<sup>-1</sup>)),  $T_1$  diagnostic values and free energies ( $\Delta G(298\text{ K})$ /(kcal·mol<sup>-1</sup>)) for the reactants, intermediates and transition states involved in the  $t\text{-N}_2\text{O}_4 + \text{NH}_3$  reaction without and with catalyst  $X$  ( $X = \text{H}_2\text{O}$ ,  $(\text{H}_2\text{O})_2$ , and  $\text{H}_2\text{SO}_4$ )

| <i>Species</i>                                                                      | ZPE  | $\Delta E$ | S     | $\Delta G$ | $\Delta(E + ZPE)$ | $\Delta H$ | $T_1$      |
|-------------------------------------------------------------------------------------|------|------------|-------|------------|-------------------|------------|------------|
| <b><i>t-N<sub>2</sub>O<sub>4</sub> + NH<sub>3</sub></i></b>                         |      |            |       |            |                   |            |            |
| <i>t-N<sub>2</sub>O<sub>4</sub> + NH<sub>3</sub></i>                                | 33.7 | 0.0        | 128.0 | 0.0        | 0.0               | 0.0        | 0.03081    |
| IM                                                                                  | 35.8 | -2.7       | 93.7  | 9.3        | -0.5              | -0.9       | 0.02209    |
| TS                                                                                  | 34.9 | 2.0        | 87.2  | 13.8       | 3.2               | 1.7        | 0.02015    |
| IMF                                                                                 | 37.0 | -17.7      | 94.3  | -5.1       | -14.3             | -15.1      | 0.01893    |
| HNO <sub>3</sub> + NH <sub>2</sub> NO                                               | 35.8 | -11.6      | 124.5 | -9.5       | -9.5              | -10.5      | 0.03862    |
| <b><i>H<sub>2</sub>O catalysis</i></b>                                              |      |            |       |            |                   |            |            |
| <i>t-N<sub>2</sub>O<sub>4</sub> + H<sub>2</sub>O + NH<sub>3</sub></i>               | 46.7 | 0.0        | 173.0 | 0.0        | 0.0               | 0.0        | 0.4085562  |
| <i>t-N<sub>2</sub>O<sub>4</sub>···H<sub>2</sub>O + NH<sub>3</sub></i>               | 48.8 | -5.0       | 141.3 | 6.1        | -2.9              | -3.3       | 0.02957932 |
| <i>NH<sub>3</sub>···H<sub>2</sub>O + t-N<sub>2</sub>O<sub>4</sub></i>               | 48.9 | -6.6       | 151.2 | 1.6        | -4.4              | -4.9       | 0.03215459 |
| IM_WM1                                                                              | 51.2 | -9.2       | 108.0 | 13.6       | -4.7              | -5.7       | 0.02132328 |
| TS_WM                                                                               | 48.6 | -2.4       | 100.5 | 18.9       | -0.5              | -2.7       | 0.0181261  |
| IMF_WM                                                                              | 52.1 | -27.9      | 109.2 | -4.8       | -22.5             | -23.8      | 0.01787333 |
| HNO <sub>3</sub> ···H <sub>2</sub> O + NH <sub>2</sub> NO                           | 50.9 | -22.2      | 140.0 | -9.6       | -18.0             | -19.4      | 0.03682544 |
| <b><i>(H<sub>2</sub>O)<sub>2</sub> catalysis</i></b>                                |      |            |       |            |                   |            |            |
| <i>t-N<sub>2</sub>O<sub>4</sub> + (H<sub>2</sub>O)<sub>2</sub> + NH<sub>3</sub></i> | 61.8 | 0.0        | 197.3 | 0.0        | 0.0               | 0.0        | 0.04107502 |
| <i>t-N<sub>2</sub>O<sub>4</sub>···(H<sub>2</sub>O)<sub>2</sub> + NH<sub>3</sub></i> | 63.9 | -8.0       | 158.1 | 5.4        | -5.9              | -6.3       | 0.02838712 |
| <i>NH<sub>3</sub>···(H<sub>2</sub>O)<sub>2</sub> + t-N<sub>2</sub>O<sub>4</sub></i> | 64.7 | -10.8      | 161.6 | 1.7        | -7.9              | -8.9       | 0.3263045  |
| IM_WD1                                                                              | 66.5 | -14.3      | 122.3 | 11.6       | -9.6              | -10.7      | 0.01976307 |
| TS_WD                                                                               | 64.1 | -11.6      | 110.3 | 13.7       | -9.3              | -12.3      | 0.0169219  |
| IMF_WD                                                                              | 67.4 | -37.0      | 123.0 | -10.8      | -31.4             | -33.0      | 0.01744671 |
| HNO <sub>3</sub> ···(H <sub>2</sub> O) <sub>2</sub> + NH <sub>2</sub> NO            | 66.1 | -27.3      | 156.9 | -12.5      | -23.0             | -24.6      | 0.03570489 |
| <b><i>H<sub>2</sub>SO<sub>4</sub> catalysis</i></b>                                 |      |            |       |            |                   |            |            |
| <i>t-N<sub>2</sub>O<sub>4</sub> + NH<sub>3</sub> + H<sub>2</sub>SO<sub>4</sub></i>  | 57.5 | 0.0        | 200.2 | 0.0        | 0.0               | 0.0        | 0.04607405 |
| <i>t-N<sub>2</sub>O<sub>4</sub>···H<sub>2</sub>SO<sub>4</sub> + NH<sub>3</sub></i>  | 58.7 | -10.7      | 165.4 | 1.1        | -9.5              | -9.2       | 0.02818615 |
| <i>NH<sub>3</sub>···H<sub>2</sub>SO<sub>4</sub> + t-N<sub>2</sub>O<sub>4</sub></i>  | 59.2 | -16.4      | 168.7 | -5.7       | -14.7             | -15.1      | 0.0367992  |
| IM_SA1                                                                              | 60.9 | -18.5      | 127.3 | 6.2        | -15.0             | -15.5      | 0.0193617  |
| TS_SA                                                                               | 58.9 | -16.8      | 122.6 | 6.7        | -15.4             | -16.5      | 0.0180758  |
| IMF_SA                                                                              | 61.9 | -32.5      | 132.2 | -8.4       | -28.0             | -28.6      | 0.01740467 |
| HNO <sub>3</sub> ···H <sub>2</sub> SO <sub>4</sub> + NH <sub>2</sub> NO             | 60.8 | -26.8      | 162.1 | -13.1      | -23.5             | -24.4      | 0.03672083 |

<sup>a</sup> ZPE and S values obtained at the B3LYP-D3/6-311++G(3df,2pd) level;

<sup>b</sup> The zero-point energies (ZPE/(kcal·mol<sup>-1</sup>)), relative energies ( $\Delta E$  and  $\Delta(E + ZPE)$ /(kcal·mol<sup>-1</sup>)), enthalpies ( $\Delta H(298\text{ K})$ /(kcal·mol<sup>-1</sup>)) entropy (S(298 K)/(cal·mol<sup>-1</sup>·K<sup>-1</sup>)),  $T_1$  diagnostic values and free energies ( $\Delta G(298\text{ K})$ /(kcal·mol<sup>-1</sup>)) obtained at the CCSD(T)/aug-cc-pVTZ//B3LYP-D3/6-311++G(3df,2pd) level.



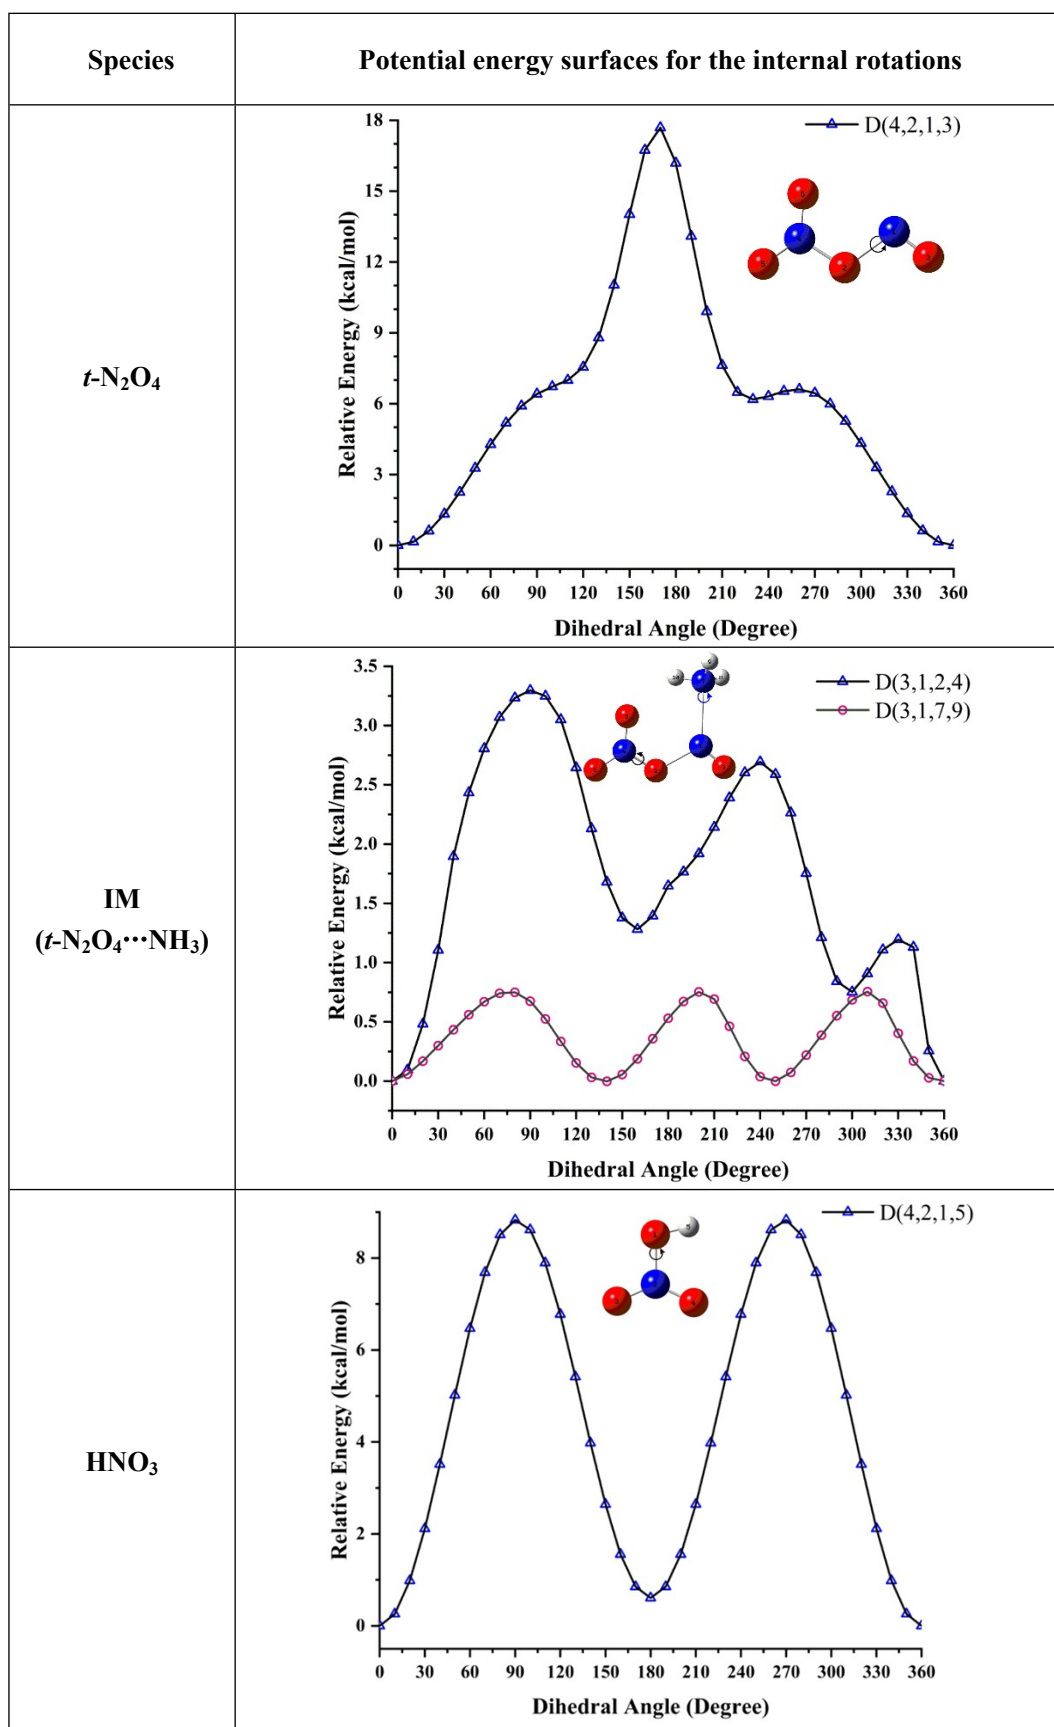

**Figure S4** Hindrance potentials for *t*-N<sub>2</sub>O<sub>4</sub>, *t*-N<sub>2</sub>O<sub>4</sub>⋯NH<sub>3</sub>, and HNO<sub>3</sub> calculated at the B3LYP-D3/6-311++G(3df,2pd) level

**Table S4** Equilibrium constants ( $\text{cm}^3 \cdot \text{molecule}^{-1}$ ) for  $\text{NH}_3 \cdots \text{H}_2\text{O}$ ,  $\text{NH}_3 \cdots (\text{H}_2\text{O})_2$ , and  $\text{NH}_3 \cdots \text{H}_2\text{SO}_4$  within the range of 213-320 K and 0-15 km <sup>a</sup>

| Altitude | $T/\text{K}$ | $\text{NH}_3 \cdots \text{H}_2\text{O}$ | $\text{NH}_3 \cdots (\text{H}_2\text{O})_2$ | $\text{NH}_3 \cdots \text{H}_2\text{SO}_4$ |
|----------|--------------|-----------------------------------------|---------------------------------------------|--------------------------------------------|
| 0 km     | 280          | $1.43 \times 10^{-20}$                  | $1.98 \times 10^{-20}$                      | $2.40 \times 10^{-14}$                     |
|          | 290          | $1.09 \times 10^{-20}$                  | $1.18 \times 10^{-20}$                      | $9.67 \times 10^{-15}$                     |
|          | 298          | $8.96 \times 10^{-21}$                  | $7.97 \times 10^{-21}$                      | $4.90 \times 10^{-15}$                     |
|          | 300          | $8.54 \times 10^{-21}$                  | $7.26 \times 10^{-21}$                      | $4.15 \times 10^{-15}$                     |
|          | 310          | $6.78 \times 10^{-21}$                  | $4.62 \times 10^{-21}$                      | $1.89 \times 10^{-15}$                     |
|          | 320          | $5.47 \times 10^{-21}$                  | $3.03 \times 10^{-21}$                      | $9.02 \times 10^{-16}$                     |
| 5 km     | 259.3        | $2.71 \times 10^{-20}$                  | $6.76 \times 10^{-20}$                      | $2.03 \times 10^{-13}$                     |
| 10 km    | 229.7        | $8.11 \times 10^{-20}$                  | $5.39 \times 10^{-19}$                      | $7.53 \times 10^{-12}$                     |
| 15 km    | 212.6        | $1.79 \times 10^{-19}$                  | $2.38 \times 10^{-18}$                      | $9.97 \times 10^{-11}$                     |

<sup>a</sup> All equilibrium constants were calculated by using energies computed at CCSD(T)/aug-cc-pVTZ level and partition functions obtained at the B3LYP-D3/6-311++G(3df,2pd) level.

**Table S5** Concentrations (molecule·cm<sup>-3</sup>) of H<sub>2</sub>O, (H<sub>2</sub>O)<sub>2</sub>, and H<sub>2</sub>SO<sub>4</sub> within the temperature range of 280-320 K

| Catalysts                                    | T/K                                                                              | 280                   | 290                   | 298                   | 300                   | 310                   | 320                   |
|----------------------------------------------|----------------------------------------------------------------------------------|-----------------------|-----------------------|-----------------------|-----------------------|-----------------------|-----------------------|
| H <sub>2</sub> O <sup>a</sup>                | 20% RH                                                                           | $5.16 \times 10^{16}$ | $9.56 \times 10^{16}$ | $1.55 \times 10^{17}$ | $1.72 \times 10^{17}$ | $2.92 \times 10^{17}$ | $4.70 \times 10^{17}$ |
|                                              | 40% RH                                                                           | $1.03 \times 10^{17}$ | $1.91 \times 10^{17}$ | $3.09 \times 10^{17}$ | $3.43 \times 10^{17}$ | $5.84 \times 10^{17}$ | $9.40 \times 10^{17}$ |
|                                              | 60% RH                                                                           | $1.55 \times 10^{17}$ | $2.87 \times 10^{17}$ | $4.64 \times 10^{17}$ | $5.15 \times 10^{17}$ | $8.77 \times 10^{17}$ | $1.41 \times 10^{18}$ |
|                                              | 80% RH                                                                           | $2.07 \times 10^{17}$ | $3.82 \times 10^{17}$ | $6.18 \times 10^{17}$ | $6.86 \times 10^{17}$ | $1.17 \times 10^{18}$ | $1.88 \times 10^{18}$ |
|                                              | 100% RH                                                                          | $2.58 \times 10^{17}$ | $4.78 \times 10^{17}$ | $7.73 \times 10^{17}$ | $8.58 \times 10^{17}$ | $1.46 \times 10^{18}$ | $2.35 \times 10^{18}$ |
| (H <sub>2</sub> O) <sub>2</sub> <sup>a</sup> | 20% RH                                                                           | $8.18 \times 10^{12}$ | $2.36 \times 10^{13}$ | $5.44 \times 10^{13}$ | $6.50 \times 10^{13}$ | $1.63 \times 10^{14}$ | $3.71 \times 10^{14}$ |
|                                              | 40% RH                                                                           | $3.27 \times 10^{13}$ | $9.46 \times 10^{13}$ | $2.18 \times 10^{14}$ | $2.60 \times 10^{14}$ | $6.52 \times 10^{14}$ | $1.48 \times 10^{15}$ |
|                                              | 60% RH                                                                           | $7.36 \times 10^{13}$ | $2.13 \times 10^{14}$ | $4.90 \times 10^{14}$ | $5.85 \times 10^{14}$ | $1.47 \times 10^{15}$ | $3.33 \times 10^{15}$ |
|                                              | 80% RH                                                                           | $1.31 \times 10^{14}$ | $3.78 \times 10^{14}$ | $8.70 \times 10^{14}$ | $1.04 \times 10^{15}$ | $2.60 \times 10^{15}$ | $5.92 \times 10^{15}$ |
|                                              | 100% RH                                                                          | $2.04 \times 10^{14}$ | $5.91 \times 10^{14}$ | $1.36 \times 10^{15}$ | $1.62 \times 10^{15}$ | $4.06 \times 10^{15}$ | $9.24 \times 10^{15}$ |
| H <sub>2</sub> SO <sub>4</sub> <sup>b</sup>  | [H <sub>2</sub> SO <sub>4</sub> ] = 10 <sup>7</sup><br>molecules·cm <sup>3</sup> | $3.90 \times 10^7$    | $3.80 \times 10^7$    | $3.70 \times 10^7$    | $3.70 \times 10^7$    | $3.60 \times 10^7$    | $3.40 \times 10^7$    |
|                                              | [H <sub>2</sub> SO <sub>4</sub> ] = 10 <sup>8</sup><br>molecules·cm <sup>3</sup> | $3.90 \times 10^8$    | $3.80 \times 10^8$    | $3.70 \times 10^8$    | $3.70 \times 10^8$    | $3.60 \times 10^8$    | $3.40 \times 10^8$    |

<sup>a</sup> The values are reported from reference (J. M. Anglada, G. J. Hoffman, L. V. Slipchenko, M. M. Costa, M. F. Ruiz-Lopez and J. S. Francisco, Atmospheric significance of water clusters and ozone-water complexes, *J. Phys. Chem. A*, 2013, **117**, 10381-10396.);

<sup>b</sup> The values are reported from reference (H. Zhang, O. Kupiainen-Määttä, X. Zhang, V. Molinero, Y. Zhang and Z. Li, The enhancement mechanism of glycolic acid on the formation of atmospheric sulfuric acid-ammonia molecular clusters, *J. Chem. Phys.*, 2017, **146**, 184308.).

**Table S6** Concentrations (molecule·cm<sup>-3</sup>) of H<sub>2</sub>O, (H<sub>2</sub>O)<sub>2</sub>, and H<sub>2</sub>SO<sub>4</sub> at different altitudes in troposphere

| Catalysts                                    | 5 km                  | 10 km                 | 15 km                 | 20 km                 | 25 km                 | 30 km                 |
|----------------------------------------------|-----------------------|-----------------------|-----------------------|-----------------------|-----------------------|-----------------------|
| H <sub>2</sub> O <sup>a</sup>                | $2.41 \times 10^{16}$ | $4.92 \times 10^{15}$ | $1.96 \times 10^{13}$ | $9.56 \times 10^{12}$ | $5.21 \times 10^{12}$ | $2.62 \times 10^{12}$ |
| (H <sub>2</sub> O) <sub>2</sub> <sup>a</sup> | $2.67 \times 10^{12}$ | $2.31 \times 10^{11}$ | $6.26 \times 10^6$    | $1.35 \times 10^6$    | $3.58 \times 10^5$    | $8.03 \times 10^4$    |
| H <sub>2</sub> SO <sub>4</sub> <sup>b</sup>  | $6.00 \times 10^7$    | $8.30 \times 10^6$    | $2.40 \times 10^5$    | $4.20 \times 10^4$    | $4.59 \times 10^5$    | $2.88 \times 10^6$    |

<sup>a</sup>The values are reported from reference (J. M. Anglada, G. J. Hoffman, L. V. Slipchenko, M. M. Costa, M. F. Ruiz-Lopez and J. S. Francisco, Atmospheric significance of water clusters and ozone-water complexes, *J. Phys. Chem. A*, 2013, **117**, 10381-10396.);

<sup>b</sup>The values are reported from reference (H. Zhang, O. Kupiainen-Määttä, X. Zhang, V. Molinero, Y. Zhang and Z. Li, The enhancement mechanism of glycolic acid on the formation of atmospheric sulfuric acid-ammonia molecular clusters, *J. Chem. Phys.*, 2017, **146**, 184308.).

**Table S7** The high-pressure limiting rate constants ( $\text{cm}^3 \cdot \text{molecule}^{-1} \cdot \text{s}^{-1}$ ) for the route from reactants to pre-reactive calculated by master equation within the altitude range of 0-15 km<sup>a</sup>

| Altitude | <i>T</i> /K | Channel R              | Channel WM             | Channel WD             | Channel SA             |
|----------|-------------|------------------------|------------------------|------------------------|------------------------|
| 0 km     | 280         | $1.12 \times 10^{-10}$ | $6.70 \times 10^{-10}$ | $2.54 \times 10^{-10}$ | $6.38 \times 10^{-11}$ |
|          | 290         | $1.14 \times 10^{-10}$ | $6.81 \times 10^{-10}$ | $2.59 \times 10^{-10}$ | $6.49 \times 10^{-11}$ |
|          | 298         | $1.16 \times 10^{-10}$ | $6.91 \times 10^{-10}$ | $2.62 \times 10^{-10}$ | $6.58 \times 10^{-11}$ |
|          | 300         | $1.16 \times 10^{-10}$ | $6.93 \times 10^{-10}$ | $2.63 \times 10^{-10}$ | $6.60 \times 10^{-11}$ |
|          | 310         | $1.18 \times 10^{-10}$ | $7.05 \times 10^{-10}$ | $2.68 \times 10^{-10}$ | $6.71 \times 10^{-11}$ |
|          | 320         | $1.20 \times 10^{-10}$ | $7.16 \times 10^{-10}$ | $2.72 \times 10^{-10}$ | $6.82 \times 10^{-11}$ |
| 5 km     | 259.3       | $1.08 \times 10^{-10}$ | $6.44 \times 10^{-10}$ | $2.45 \times 10^{-10}$ | $6.13 \times 10^{-11}$ |
| 10 km    | 229.7       | $1.02 \times 10^{-10}$ | $6.07 \times 10^{-10}$ | $2.30 \times 10^{-10}$ | $5.78 \times 10^{-11}$ |
| 15 km    | 212.6       | $9.78 \times 10^{-11}$ | $5.84 \times 10^{-10}$ | $2.22 \times 10^{-10}$ | $5.56 \times 10^{-11}$ |

<sup>a</sup> Channel R, Channel WM, Channel WD, and Channel SA were respectively denoted the *t*-N<sub>2</sub>O<sub>4</sub> + NH<sub>3</sub> reaction without and with H<sub>2</sub>O, (H<sub>2</sub>O)<sub>2</sub>, and H<sub>2</sub>SO<sub>4</sub>.

The VRC-VTST calculations were carried out with the potential surface obtained at CCSD(T)/aug-cc-pVTZ//B3LYP-D3/6-311++G(3*df*,2*pd*) level, and were performed by variationally minimizing the rate constant with respect to the distances between pivot points and with respect to the location of the pivot points. Specifically, a single-faceted dividing surface for the ammonolysis of *t*-N<sub>2</sub>O<sub>4</sub> with *X* were produced by using two pivot points. Such as, using two pivot points produces a single-faceted dividing surface for the one-step reaction of NH<sub>3</sub>⋯*X* + *t*-N<sub>2</sub>O<sub>4</sub>. One pivot point is located at a distanced from the center of mass (COM) of NH<sub>3</sub>⋯*X*, where the vector connecting the pivot point with NH<sub>3</sub>⋯*X*'s COM is perpendicular to the NH<sub>3</sub>⋯*X* plane, and the other pivot point is located at a distanced from the COM of *t*-N<sub>2</sub>O<sub>4</sub>, where the vector connecting the pivot point with *t*-N<sub>2</sub>O<sub>4</sub>'s COM is perpendicular to *t*-N<sub>2</sub>O<sub>4</sub> plane. The lengths of these vectors are fixed successively at 0.2 Å. The reaction coordinates is the distance between a pivot point on one reactant and a pivot point on the other reactant. The distances between pivot points is varied from 2.5 to 6.0 Å for NH<sub>3</sub>⋯*X* + *t*-N<sub>2</sub>O<sub>4</sub> in each case with a 0.2 Å grid increment.

**Table S8** Rate constants ( $k$ ) (in  $\text{cm}^3 \cdot \text{molecule}^{-1} \cdot \text{s}^{-1}$ ) for the  $t\text{-N}_2\text{O}_4 + \text{NH}_3$  reaction without and with catalyst  $X$  ( $X = \text{H}_2\text{O}$ ,  $(\text{H}_2\text{O})_2$ , and  $\text{H}_2\text{SO}_4$ ) calculated by master equation within the temperature range of 280-320 K and the pressure range of 10-760 Torr <sup>a</sup>

| $T(\text{K})$   | 10 Torr | 50 Torr                | 100 Torr               | 300 Torr               | 760 Torr               |                        |
|-----------------|---------|------------------------|------------------------|------------------------|------------------------|------------------------|
| $k_{\text{R}}$  | 280     | $5.03 \times 10^{-17}$ | $5.14 \times 10^{-17}$ | $5.16 \times 10^{-17}$ | $5.18 \times 10^{-17}$ | $5.20 \times 10^{-17}$ |
|                 | 290     | $5.90 \times 10^{-17}$ | $6.07 \times 10^{-17}$ | $6.10 \times 10^{-17}$ | $6.12 \times 10^{-17}$ | $6.13 \times 10^{-17}$ |
|                 | 298     | $6.65 \times 10^{-17}$ | $6.88 \times 10^{-17}$ | $6.92 \times 10^{-17}$ | $6.94 \times 10^{-17}$ | $6.95 \times 10^{-17}$ |
|                 | 300     | $6.84 \times 10^{-17}$ | $7.09 \times 10^{-17}$ | $7.13 \times 10^{-17}$ | $7.16 \times 10^{-17}$ | $7.17 \times 10^{-17}$ |
|                 | 310     | $7.84 \times 10^{-17}$ | $8.20 \times 10^{-17}$ | $8.26 \times 10^{-17}$ | $8.30 \times 10^{-17}$ | $8.32 \times 10^{-17}$ |
|                 | 320     | $9.40 \times 10^{-17}$ | $9.40 \times 10^{-17}$ | $9.55 \times 10^{-17}$ | $9.55 \times 10^{-17}$ | $9.57 \times 10^{-17}$ |
| $k_{\text{WM}}$ | 280     | $1.16 \times 10^{-19}$ |
|                 | 290     | $1.33 \times 10^{-19}$ |
|                 | 298     | $1.48 \times 10^{-19}$ |
|                 | 300     | $1.52 \times 10^{-19}$ |
|                 | 310     | $1.72 \times 10^{-19}$ |
|                 | 320     | $1.93 \times 10^{-19}$ |
| $k_{\text{WD}}$ | 280     | $6.07 \times 10^{-16}$ |
|                 | 290     | $5.29 \times 10^{-16}$ |
|                 | 298     | $4.76 \times 10^{-16}$ |
|                 | 300     | $4.64 \times 10^{-16}$ |
|                 | 310     | $4.11 \times 10^{-16}$ |
|                 | 320     | $3.66 \times 10^{-16}$ |
| $k_{\text{SA}}$ | 280     | $1.48 \times 10^{-16}$ | $1.49 \times 10^{-16}$ | $1.49 \times 10^{-16}$ | $1.49 \times 10^{-16}$ | $1.49 \times 10^{-16}$ |
|                 | 290     | $1.48 \times 10^{-16}$ | $1.49 \times 10^{-16}$ | $1.49 \times 10^{-16}$ | $1.49 \times 10^{-16}$ | $1.50 \times 10^{-16}$ |
|                 | 298     | $1.48 \times 10^{-16}$ | $1.50 \times 10^{-16}$ | $1.50 \times 10^{-16}$ | $1.50 \times 10^{-16}$ | $1.50 \times 10^{-16}$ |
|                 | 300     | $1.49 \times 10^{-16}$ | $1.50 \times 10^{-16}$ | $1.50 \times 10^{-16}$ | $1.51 \times 10^{-16}$ | $1.51 \times 10^{-16}$ |
|                 | 310     | $1.49 \times 10^{-16}$ | $1.51 \times 10^{-16}$ | $1.52 \times 10^{-16}$ | $1.52 \times 10^{-16}$ | $1.52 \times 10^{-16}$ |
|                 | 320     | $1.49 \times 10^{-16}$ | $1.53 \times 10^{-16}$ | $1.53 \times 10^{-16}$ | $1.54 \times 10^{-16}$ | $1.54 \times 10^{-16}$ |

<sup>a</sup>  $k_{\text{R}}$ ,  $k_{\text{WM}}$ ,  $k_{\text{WD}}$ , and  $k_{\text{SA}}$  were respectively denoted the rate constants for the  $t\text{-N}_2\text{O}_4 + \text{NH}_3$ ,  $t\text{-N}_2\text{O}_4 + \text{NH}_3 \cdots \text{H}_2\text{O}$ ,  $t\text{-N}_2\text{O}_4 + \text{NH}_3 \cdots (\text{H}_2\text{O})_2$ , and  $t\text{-N}_2\text{O}_4 + \text{NH}_3 \cdots \text{H}_2\text{SO}_4$  reactions.

**Table S9** Calculated effective rate constants ( $k'$ ,  $\text{s}^{-1}$ ) for the  $t\text{-N}_2\text{O}_4 + \text{NH}_3$  reaction with catalyst  $X$  ( $X = \text{H}_2\text{O}$ ,  $(\text{H}_2\text{O})_2$ , and  $\text{H}_2\text{SO}_4$ ) within the temperature range of 280-320 K <sup>a</sup>

| Catalysts        | RH                                                            | 280 K                  | 290 K                  | 298 K                  | 300 K                  | 310 K                  | 320 K                  |
|------------------|---------------------------------------------------------------|------------------------|------------------------|------------------------|------------------------|------------------------|------------------------|
| $k'_{\text{WM}}$ | 20% RH                                                        | $8.58 \times 10^{-23}$ | $1.39 \times 10^{-22}$ | $2.05 \times 10^{-22}$ | $2.23 \times 10^{-22}$ | $3.40 \times 10^{-22}$ | $4.97 \times 10^{-22}$ |
|                  | 40% RH                                                        | $1.71 \times 10^{-22}$ | $2.78 \times 10^{-22}$ | $4.09 \times 10^{-22}$ | $4.44 \times 10^{-22}$ | $6.80 \times 10^{-22}$ | $9.95 \times 10^{-22}$ |
|                  | 60% RH                                                        | $2.58 \times 10^{-22}$ | $4.18 \times 10^{-22}$ | $6.14 \times 10^{-22}$ | $6.67 \times 10^{-22}$ | $1.02 \times 10^{-21}$ | $1.49 \times 10^{-21}$ |
|                  | 80% RH                                                        | $3.44 \times 10^{-22}$ | $5.57 \times 10^{-22}$ | $8.18 \times 10^{-22}$ | $8.88 \times 10^{-22}$ | $1.36 \times 10^{-21}$ | $1.99 \times 10^{-21}$ |
|                  | 100% RH                                                       | $4.29 \times 10^{-22}$ | $6.96 \times 10^{-22}$ | $1.02 \times 10^{-21}$ | $1.11 \times 10^{-21}$ | $1.70 \times 10^{-21}$ | $2.49 \times 10^{-21}$ |
|                  | $k'_{\text{WM}}/k_{\text{tot}}$                               | $8.26 \times 10^{-6}$  | $1.14 \times 10^{-5}$  | $1.47 \times 10^{-5}$  | $1.55 \times 10^{-5}$  | $2.04 \times 10^{-5}$  | $2.60 \times 10^{-5}$  |
| $k'_{\text{WD}}$ | 20% RH                                                        | $9.81 \times 10^{-23}$ | $1.47 \times 10^{-22}$ | $2.07 \times 10^{-22}$ | $2.19 \times 10^{-22}$ | $3.09 \times 10^{-22}$ | $4.11 \times 10^{-22}$ |
|                  | 40% RH                                                        | $3.92 \times 10^{-22}$ | $5.89 \times 10^{-22}$ | $8.28 \times 10^{-22}$ | $8.76 \times 10^{-22}$ | $1.24 \times 10^{-21}$ | $1.64 \times 10^{-21}$ |
|                  | 60% RH                                                        | $8.82 \times 10^{-22}$ | $1.33 \times 10^{-21}$ | $1.86 \times 10^{-21}$ | $1.97 \times 10^{-21}$ | $2.79 \times 10^{-21}$ | $3.69 \times 10^{-21}$ |
|                  | 80% RH                                                        | $1.57 \times 10^{-21}$ | $2.35 \times 10^{-21}$ | $3.30 \times 10^{-21}$ | $3.50 \times 10^{-21}$ | $4.93 \times 10^{-21}$ | $6.57 \times 10^{-21}$ |
|                  | 100% RH                                                       | $2.45 \times 10^{-21}$ | $3.68 \times 10^{-21}$ | $5.16 \times 10^{-21}$ | $5.46 \times 10^{-21}$ | $7.70 \times 10^{-21}$ | $1.02 \times 10^{-20}$ |
|                  | $k'_{\text{WD}}/k_{\text{tot}}$                               | $4.71 \times 10^{-5}$  | $6.00 \times 10^{-5}$  | $7.43 \times 10^{-5}$  | $7.61 \times 10^{-5}$  | $9.26 \times 10^{-5}$  | $1.07 \times 10^{-4}$  |
| $k'_{\text{SA}}$ | $[\text{H}_2\text{SO}_4] = 10^7$<br>molecules·cm <sup>3</sup> | $1.39 \times 10^{-22}$ | $5.49 \times 10^{-23}$ | $2.72 \times 10^{-23}$ | $2.32 \times 10^{-23}$ | $1.03 \times 10^{-23}$ | $4.71 \times 10^{-24}$ |
|                  | $[\text{H}_2\text{SO}_4] = 10^8$<br>molecules·cm <sup>3</sup> | $1.39 \times 10^{-21}$ | $5.49 \times 10^{-22}$ | $2.72 \times 10^{-22}$ | $2.32 \times 10^{-22}$ | $1.03 \times 10^{-22}$ | $4.71 \times 10^{-23}$ |
|                  | $k'_{\text{SA}}/k_{\text{tot}}$                               | $2.67 \times 10^{-5}$  | $8.97 \times 10^{-6}$  | $3.92 \times 10^{-6}$  | $3.23 \times 10^{-6}$  | $1.24 \times 10^{-6}$  | $4.93 \times 10^{-7}$  |

<sup>a</sup>  $k'_{\text{WM}}$ ,  $k'_{\text{WD}}$ , and  $k'_{\text{SA}}$  were respectively denoted the effective rate constants for the  $t\text{-N}_2\text{O}_4 + \text{NH}_3 \cdots \text{H}_2\text{O}$ ,  $t\text{-N}_2\text{O}_4 + \text{NH}_3 \cdots (\text{H}_2\text{O})_2$ , and  $t\text{-N}_2\text{O}_4 + \text{NH}_3 \cdots \text{H}_2\text{SO}_4$  reactions;  $k_{\text{tot}}$  represents the sum of  $k_{\text{R}}$ ,  $k'_{\text{WD}}$ , and  $k'_{\text{SA}}$  ( $k_{\text{tot}} = k_{\text{R}} + k'_{\text{WD}} + k'_{\text{SA}}$ ).
